### Errata

In the Reply by Paul J. Heller (ANESTHESIOLOGY 66:578-579, 1987) the following corrections should be made: Page 578, second column, line 9 should read, ". . . vascular resistance.<sup>5</sup>" Page 578, second column, second paragraph, line 4 should read, ". . . presented by Leighton *et al.*.\*" Page 579, first column, first line should read, ". . . American Society of Anesthesiologists.<sup>7</sup>" Page 579, second column, Reference 9 should read, "ANESTHESIOLOGY 66:99-100, 1987," and Reference 10 should read, "ANESTHESIOLOGY 66:99, 1987."

In ANESTHESIOLOGY volume 66, number 5, the title of the article by Kettlekamp *et al.* (pp 666-669) should correctly read "Inhibition of d-Tubocurarine-induced Histamine Release by Halothane."

In ANESTHESIOLOGY volume 65, number 5, in the Letter titled "Pulse Oximetry during Shoulder Arthroscopy" (p 565), the authors' names were incorrectly listed. They should have appeared as follows:

ZVI J. HERSCHMAN, M.D.  
Resident  
Department of Anesthesiology

MARTIN I. LEVY, M.D.  
Assistant Professor  
Department of Orthopedic Surgery

ELIZABETH A. M. FROST, M.D.  
Professor  
Department of Anesthesiology

PAUL L. GOLDINER, M.D.  
Professor and Chairman  
Department of Anesthesiology  
Albert Einstein College of Medicine  
1300 Morris Park Avenue  
Bronx, New York 10461
